# Supplementary material for: Synthetically persistent, self assembled [VIV2VV4] polyoxovanadates: Facile synthesis, structure and magnetic analysis
Source: Royal Society of Chemistry journal article supplement (doi:10.1039/c1dt11004g), 2011-01-01
Supplement: c1dt11004g.pdf [file c1dt11004g.pdf]

# Synthetically persistent, self assembled $[V^{IV}_2V^V_4]$ polyoxovanadates: Facile synthesis, structure and magnetic analysis

Nadia Marino,<sup>a,\*</sup> Francisco Lloret,<sup>b</sup> Miguel Julve<sup>b,\*</sup> and Robert P. Doyle<sup>a,\*</sup>

Supplementary Materials

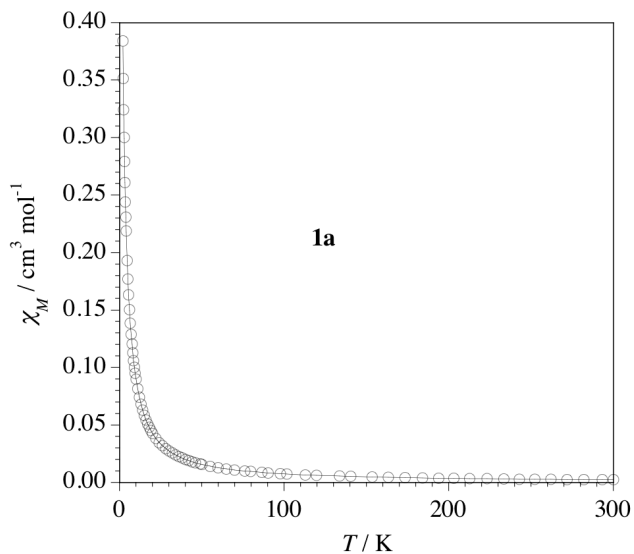

Figure S1.  $\chi$  versus T plot for **1a**.

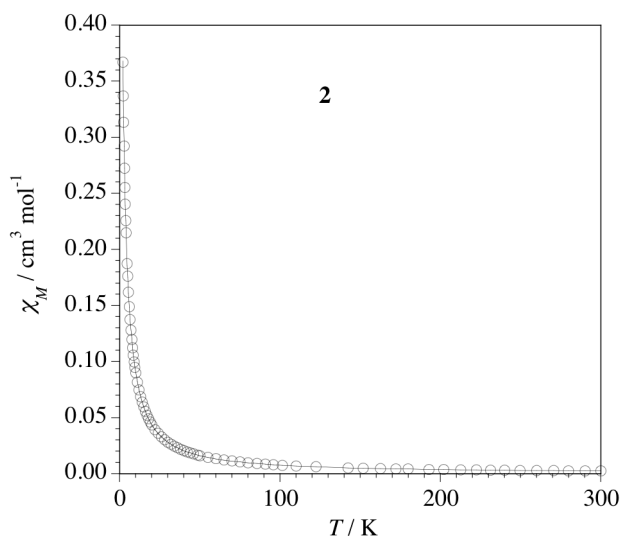

Figure S2.  $\chi$  versus T plot for **2**.
